# Supplementary material
Source: publisher figshare collection journal article supplement (https://sage.figshare.com/ndownloader/files/13078199)
Supplement: Supplementary file 1 [file 13078199]

Archive with 1 entries (1 files):
- 13078199.out
